# Supplementary material
Source: HighWire-hosted journal article supplement (https://bmjopen.bmj.com/content/12/8/e056532)
Supplement: inline-supplementary-material-2 [file inline-supplementary-material-2.pdf]

## Supplementary Figure 1. Medline, AMED, PsychINFO and CINAHL Full Search Strategies.

### Medline Search Strategy

1. (Long term adj3 condition\*).mp.
2. chronic\*.mp.
3. ((persistent or long\* term or ongoing or degenerative) adj3 (disease\* or ill\* or condition\* or insufficienc\* or disorder\*)).tw.
4. long term care/
5. long\* term care.tw.
6. exp cardiovascular diseases/
7. (heart disease\* or heart failure or myocardial ischemia or coronary disease\* or coronary artery disease\* or myocardial infarction or hypertension or high blood pressure).tw.
8. sickle cell.mp.
9. exp lung diseases obstructive/
10. (obstructive lung disease\* or obstructive pulmonary disease\* or copd or asthma or bronchitis).tw.
11. exp emphysema/
12. exp pulmonary emphysema/
13. emphysema.tw.
14. (cystic fibrosis or respiratory distress).mp.
15. exp nervous system diseases/
16. (brain adj (disease\* or damage\* or injur\*)).tw.
17. (cerebrovascular or brain ischemia or cerebral infarction or carotid artery disease\* or stroke or epilep\* or seizure\*).tw.
18. (neurodegenerative or Huntingdon\* or Parkinson\* or amyotrophic lateral sclerosis or multiple sclerosis or motor neuron disease).tw.
19. (paralys\* or quadriplegi\* or tetraplegi\* or paraplegi\* or locked in syndrome).tw.
20. ((communication or learning or consciousness or perpetual or speech or voice or vision or hearing or psychomotor) adj disorder\*).tw.
21. (hearing loss or hearing aid\* or deaf\* or blind\* or stutter\*).tw.
22. down\* syndrome.tw.
23. cerebral palsy.tw.
24. exp gastrointestinal diseases/
25. (gastroenter\* or intestinal or bowel or colonic).tw.
26. renal insufficiency/
27. ((renal or kidney) adj (failure\* or insufficienc\*)).tw.
28. diabetes mellitus/
29. (diabetes or diabetic\*).tw.
30. exp nutrition disorders/
31. (underweight or malnutrition or malnourished or overweight or obes\*).tw.
32. exp arthritis/
33. exp rheumatic diseases/
34. (arthritis or osteoarthritis or rheumati\* or fibromyalgia).tw.
35. ((back or neck) adj pain).tw.
36. exp thyroid diseases/
37. thyroid.tw.
38. exp hypersensitivity/
39. (hypersensitivit\* or allerg\* or intolerance or anaphyla\*).mp.
40. exp neoplasms/
41. (cancer\* or oncolog\* or neoplasm\* or carcinom\* or tumor\* or malignan\* or leuk?emia).tw.
42. exp hiv infections/

43. (hiv infect\* or hiv disease\*).tw.
44. exp mental disorders/
45. exp behavio?ral symptoms/
46. ((mental\* or psychiatr\* or psychological\*) adj (ill\* or disorder\* or disease\* or distress\* or disab\* or problem\* or health\* or patient\* or treatment)).tw.
47. ((personality or mood or dysthymic or cognit\* or anxiety or stress or eating or adjustment or reactive or somatoform or conversion or behavio?r or perception or psycho\* or impulse control or development\* or attention deficit or hyperactivity or conduct or motor skills or movement or tic or substance related) adj disorder\*).tw.
48. (psychos#s or psychotic\* or paranoi\* or schizo\* or neuros#s or neurotic\* or delusion\* or depression or depressive or bipolar or mania or manic or obsessi\* or compulsi\* or panic or phobic or phobia or anorexia or bulimia or neurastheni\* or dissociative or autis\* or Asperger\* or Tourette or dyslex\* or affective or borderline or narcissis\* or suicid\* or self injur\* or self harm or adhd).tw.
49. (((substance or drug or alcohol) adj abuse) or "substance use" or "illegal drug use" or addict\* or alcoholism or (problem\* adj1 drinking)).tw.
50. 1 or 2 or 3 or 4 or 5 or 6 or 7 or 8 or 9 or 10 or 11 or 12 or 13 or 14 or 15 or 16 or 17 or 18 or 19 or 20 or 21 or 22 or 23 or 24 or 25 or 26 or 27 or 28 or 29 or 30 or 31 or 32 or 33 or 34 or 35 or 36 or 37 or 38 or 39 or 40 or 41 or 42 or 43 or 44 or 45 or 46 or 47 or 48 or 49
51. self efficacy/ or self care/
52. self administration/ or self assessment/ or self concept/
53. patient compliance/ or patient education as topic/ or patient participation/ or patient satisfaction/
54. consumer health information/ or consumer participation/
55. attitude to health/ or health behavio?r/ or health education/ or health knowledge, attitudes, practice/ or health promotion/
56. life style/ or disease management/ or risk reduction behavio?r/
57. adaptation, psychological/ or motivation/ or goals/ or problem solving/ or exp decision making/
58. health plan implementation/
59. (self care or selfcare or self management or selfmanagement or self efficacy or selfefficacy or self monitor\$ or selfmonitor\$).tw.
60. ((self or oneself) adj3 care).tw.
61. ((patient\$ or consumer\$ or client\$) adj5 (educat\$ or participat\$ or behavio?r\$ or behavio?r\$ or compliance or centered)).tw.
62. (health adj5 (promot\$ or educat\$ or behav\$)).tw.
63. (risk adj3 reduc\$ adj3 behav\$).tw.
64. ((patient\$ or consumer\$ or client\$) adj5 manag\$ adj5 disease\$).tw.
65. (((behav\$ adj3 chang\$) or (problem\$ adj3 solv\$) or (goal\$ adj3 setting) or (decision\$ adj3 mak\$) or coping) adj5 (patient\$ or consumer\$ or client\$)).tw.
66. 51 or 52 or 53 or 54 or 55 or 56 or 57 or 58 or 59 or 60 or 61 or 62 or 63 or 64 or 65
67. randomized controlled trial/ or pragmatic clinical trial/
68. randomi?ed controlled trial.mp.
69. controlled clinical trial/
70. randomized controlled trial/
71. double-blind method/ or random allocation/ or single-blind method/
72. Clinical Trials as Topic/
73. placebo.mp.
74. randomi?ed.mp.
75. Drug Therapy/
76. drug therapy.mp.
77. randomly.mp.
78. clinical trial/
79. trial.mp.
80. groups.mp.

81. 67 or 68 or 69 or 70 or 71 or 72 or 73 or 74 or 75 or 76 or 77 or 78 or 79 or 80
82. exp animals/ not humans.sh.
83. (#81 not #82).mp.
84. 50 and 66 and 83

#### AMED Search Strategy

1. (Long term adj3 condition\*).mp. [mp=abstract, heading words, title]
2. chronic\*.mp.
3. ((persistent or long\* term or ongoing or degenerative) adj3 (disease\* or ill\* or condition\* or insufficienc\* or disorder\*)).mp. [mp=abstract, heading words, title]
4. long term care/
5. long\* term care.tw.
6. Cardiovascular disease/
7. (heart disease\* or heart failure or myocardial ischemia or coronary disease\* or coronary artery disease\* or myocardial infarction or hypertension or high blood pressure).tw.
8. sickle cell.mp.
9. lung disease/
10. (obstructive lung disease\* or obstructive pulmonary disease\* or copd or asthma or bronchitis).tw.
11. emphysema/
12. pulmonary emphysema/
13. emphysema.tw.
14. (cystic fibrosis or respiratory distress).mp.
15. (brain adj (disease\* or damage\* or injur\*)).tw.
16. (cerebrovascular or brain ischemia or cerebral infarction or carotid artery disease\* or stroke or epilep\* or seizure\*).tw.
17. (neurodegenerative or Huntingdon\* or Parkinson\* or amyotrophic lateral sclerosis or multiple sclerosis or motor neuron disease).tw.
18. (paralys\* or quadriplegi\* or tetraplegi\* or paraplegi\* or locked in syndrome).tw.
19. ((communication or learning or consciousness or perpetual or speech or voice or vision or hearing or psychomotor) adj disorder\*).tw.
20. (hearing loss or deaf\* or blind\*).tw.
21. down\* syndrome.tw.
22. cerebral palsy.tw.
23. exp gastrointestinal disease/
24. exp nervous system disease/
25. (gastroenter\* or intestinal or bowel or colonic).tw.
26. ((renal or kidney) adj (failure\* or insufficienc\*)).tw.
27. diabetes mellitus/
28. (diabetes or diabetic\*).tw.
29. exp nutrition disorders/
30. (underweight or malnutrition or malnourished).tw.
31. exp arthritis/
32. exp rheumatic disease/
33. fibromyalgia.tw.
34. ((back or neck) adj pain).tw.
35. exp thyroid disease/
36. thyroid.tw.
37. exp hypersensitivity/
38. (hypersensitivit\* or allerg\* or intolerance or anaphyla\*).mp.
39. exp neoplasms/
40. (cancer\* or oncolog\* or neoplasm\* or carcinom\* or tumo?r\* or malignan\* or leuk?emia).tw.

41. exp hiv infections/
42. (hiv infect\* or hiv disease\*).tw.
43. exp mental disorders/
44. ((mental\* or psychiatr\* or psychological\*) adj (ill\* or disorder\* or disease\* or distress\* or disab\* or problem\* or health\* or patient\* or treatment)).tw.
45. ((personality or mood or dysthymic or cognit\* or anxiety or stress or eating or adjustment or reactive or somatoform or conversion or behavio?r or perception or psycho\* or impulse control or development\* or attention deficit or hyperactivity or conduct or motor skills or movement or tic or substance related) adj disorder\*).tw.
46. (psychos?s or psychotic\* or paranoi\* or schizo\* or neuros?s or neurotic\* or delusion\* or depression or depressive or bipolar or mania or manic or obsessi\* or compulsi\* or panic or phobic or phobia or anorexia or bulimia or neurastheni\* or dissociative or autis\* or Asperger\* or Tourette or dyslex\* or affective or borderline or narcissis\* or suicid\* or self injur\* or self harm or adhd).tw.
47. (((substance or drug or alcohol) adj abuse) or "substance use" or "illegal drug use" or addict\* or alcoholism or (problem\* adj1 drinking)).tw.
48. 1 or 2 or 3 or 4 or 5 or 6 or 7 or 8 or 9 or 10 or 11 or 12 or 13 or 14 or 15 or 16 or 17 or 18 or 19 or 20 or 21 or 22 or 23 or 24 or 25 or 26 or 27 or 28 or 29 or 30 or 31 or 32 or 33 or 34 or 35 or 36 or 37 or 38 or 39 or 40 or 41 or 42 or 43 or 44 or 45 or 46 or 47
49. self efficacy/ or self care/
50. self administration/ or self assessment/ or self concept/
51. patient compliance/ or patient education/ or patient participation/
52. attitude to health/ or health behavio?r/ or health education/ or health knowledge, attitudes, practice/ or health promotion/
53. life style/ or disease management/ or risk reduction behavio?r/
54. adaptation, psychological/ or motivation/ or goals/ or problem solving/ or exp decision making/
55. (consumer health information or consumer participation).mp. [mp=abstract, heading words, title]
56. health plan implementation.mp.
57. (self care or self management or self efficacy or self monitor\$).tw.
58. ((self or oneself) adj3 care).tw.
59. ((patient\$ or consumer\$ or client\$) adj5 (educat\$ or participat\$ or behavio?r\$ or behavio?r\$ or compliance or centered)).tw.
60. (health adj5 (promot\$ or educat\$ or behav\$)).tw.
61. (risk adj3 reduc\$ adj3 behav\$).tw.
62. ((patient\$ or consumer\$ or client\$) adj5 manag\$ adj5 disease\$).tw.
63. (((behav\$ adj3 chang\$) or (problem\$ adj3 solv\$) or (goal\$ adj3 setting) or (decision\$ adj3 mak\$) or coping) adj5 (patient\$ or consumer\$ or client\$)).tw.
64. 49 or 50 or 51 or 52 or 53 or 54 or 55 or 56 or 57 or 58 or 59 or 60 or 61 or 62 or 63
65. randomized controlled trial.pt.
66. controlled clinical trial.pt.
67. randomized.ab.
68. placebo.ab.
69. randomly.ab.
70. clinical trials.sh.
71. trial.ti.
72. 65 or 66 or 67 or 68 or 69 or 70 or 71
73. exp animals/ not humans.sh.
74. 72 not 73
75. 48 and 64 and 74

PsychINFO Search Strategy

1. (Long term adj3 condition\*).mp. [mp=title, abstract, heading word, table of contents, key concepts, original title, tests & measures, mesh]
2. chronic\*.mp.
3. ((persistent or long\* term or ongoing or degenerative) adj3 (disease\* or ill\* or condition\* or insufficienc\* or disorder\*)).tw.
4. long term care/
5. long\* term care.tw.
6. (heart disease\* or heart failure or myocardial ischemia or coronary disease\* or coronary artery disease\* or myocardial infarction or hypertension or high blood pressure).tw.
7. sickle cell.mp.
8. (obstructive lung disease\* or obstructive pulmonary disease\* or copd or asthma or bronchitis).tw.
9. exp emphysema/
10. exp pulmonary emphysema/
11. emphysema.tw.
12. (cystic fibrosis or respiratory distress).mp.
13. exp nervous system disorders/
14. exp cardiovascular disorders/
15. exp lung disorders/
16. (brain adj (disease\* or damage\* or injur\*)).tw.
17. (cerebrovascular or brain ischemia or cerebral infarction or carotid artery disease\* or stroke or epilep\* or seizure\*).tw.
18. (neurodegenerative or Huntingdon\* or Parkinson\* or amyotrophic lateral sclerosis or multiple sclerosis or motor neuron disease).tw.
19. (paralys\* or quadriplegi\* or tetraplegi\* or paraplegi\* or locked in syndrome).tw.
20. ((communication or learning or consciousness or perpetual or speech or voice or vision or hearing or psychomotor) adj disorder\*).tw.
21. (hearing loss or hearing aid\* or deaf\* or blind\* or stutter\*).tw.
22. down\* syndrome.tw.
23. cerebral palsy.tw.
24. exp gastrointestinal disorders/
25. (gastroenter\* or intestinal or bowel or colonic).tw.
26. renal insufficiency/
27. ((renal or kidney) adj (failure\* or insufficienc\*)).tw.
28. diabetes mellitus/
29. (diabetes or diabetic\*).tw.
30. eating disorders/
31. (underweight or malnutrition or malnourished or overweight or obes\*).tw.
32. exp arthritis/
33. rheumatoid arthritis/
34. (arthritis or osteoarthritis or rheumati\* or fibromyalgia).tw.
35. ((back or neck) adj pain).tw.
36. thyroid disorders/
37. thyroid.tw.
38. exp hypersensitivity/
39. (hypersensitivit\* or allerg\* or intolerance or anaphyla\*).mp.
40. exp neoplasms/
41. (cancer\* or oncolog\* or neoplasm\* or carcinom\* or tumor\* or malignan\* or leuk?emia).tw.
42. exp AIDS/ or exp HIV/
43. (hiv infect\* or hiv disease\*).tw.
44. exp mental disorders/
45. exp Behavior Problems/ or behavio?ral symptoms.mp.

46. ((mental\* or psychiatr\* or psychological\*) adj (ill\* or disorder\* or disease\* or distress\* or disab\* or problem\* or health\* or patient\* or treatment)).tw.
47. ((personality or mood or dysthymic or cognit\* or anxiety or stress or eating or adjustment or reactive or somatoform or conversion or behavio?r or perception or psycho\* or impulse control or development\* or attention deficit or hyperactivity or conduct or motor skills or movement or tic or substance related) adj disorder\*).tw.
48. (psychos#s or psychotic\* or paranoi\* or schizo\* or neuros#s or neurotic\* or delusion\* or depression or depressive or bipolar or mania or manic or obsessi\* or compulsi\* or panic or phobic or phobia or anorexia or bulimia or neurastheni\* or dissociative or autis\* or Asperger\* or Tourette or dyslex\* or affective or borderline or narcissis\* or suicid\* or self injur\* or self harm or adhd).tw.
49. (((substance or drug or alcohol) adj abuse) or "substance use" or "illegal drug use" or addict\* or alcoholism or (problem\* adj1 drinking)).tw.
50. 1 or 2 or 3 or 4 or 5 or 6 or 7 or 8 or 9 or 10 or 11 or 12 or 13 or 14 or 15 or 16 or 17 or 18 or 19 or 20 or 21 or 22 or 23 or 24 or 25 or 26 or 27 or 28 or 29 or 30 or 31 or 32 or 33 or 34 or 35 or 36 or 37 or 38 or 39 or 40 or 41 or 42 or 43 or 44 or 45 or 46 or 47 or 48 or 49
51. self efficacy/ or self care/
52. self administration/ or self assessment/ or self concept/
53. patient compliance/ or patient education as topic/ or patient participation/ or patient satisfaction.
54. consumer health information/ or consumer participation/
55. attitude to health/ or health behavio?r/ or health education/ or health knowledge, attitudes, practice/ or health promotion/
56. life style/ or disease management/ or risk reduction behavio?r/
57. adaptation, psychological/ or motivation/ or goals/ or problem solving/ or exp decision making/
58. health plan implementation/
59. (self care or selfcare or self management or selfmanagement or self efficacy or selfefficacy or self monitor\$ or selfmonitor\$).tw.
60. ((self or oneself) adj3 care).tw.
61. ((patient\$ or consumer\$ or client\$) adj5 (educat\$ or participat\$ or behavio?r\$ or behavio?r\$ or compliance or centered)).tw.
62. (health adj5 (promot\$ or educat\$ or behav\$)).tw.
63. (risk adj3 reduc\$ adj3 behav\$).tw.
64. ((patient\$ or consumer\$ or client\$) adj5 manag\$ adj5 disease\$).tw.
65. (((behav\$ adj3 chang\$) or (problem\$ adj3 solv\$) or (goal\$ adj3 setting) or (decision\$ adj3 mak\$) or coping) adj5 (patient\$ or consumer\$ or client\$)).tw.
66. 51 or 52 or 53 or 54 or 55 or 56 or 57 or 58 or 59 or 60 or 61 or 62 or 63 or 64 or 65
67. exp Randomized Controlled Trials/
68. exp Clinical Trials/
69. exp Randomized Controlled Trials/ or exp Randomized Clinical Trials/
70. exp Placebo/
71. exp Drug Therapy/
72. randomly.mp.
73. trial.mp.
74. groups.mp.
75. 67 or 68 or 69 or 70 or 71 or 72 or 73 or 74
76. exp animals/ not humans.sh.
77. (#75 not #76).mp. [mp=title, abstract, heading word, table of contents, key concepts, original title, tests & measures, mesh]
78. 50 and 66 and 77

CINAHL Search Strategy

S1. long term condition

- S2. chronic
- S3. ((persistent or long term or ongoing or degenerative) (disease or ill\* or condition or insufficienc\* or disorder))
- S4. long term care
- S5. cardiovascular diseases
- S6. (heart disease or heart failure or myocardial ischemia or coronary disease or coronary artery disease or myocardial infarction or hypertension or high blood pressure)
- S7. sickle cell
- S8. lung diseases, obstructive
- S9. (obstructive lung disease or obstructive pulmonary disease or copd or asthma or bronchitis)
- S10. down\* syndrome
- S11. cerebral palsy
- S12. emphysema
- S13. gastrointestinal disorders
- S14. renal insufficiency
- S15. ((renal or kidney) failure)
- S16. diabetes mellitus
- S17. nutrition disorders
- S18. arthritis
- S19. rheumatic diseases
- S20. fibromyalgia
- S21. (cystic fibrosis or respiratory distress)
- S22. thyroid disease
- S23. (hypersensitivity or allergy or anaphylaxis)
- S24. (cancer\* or oncolog\* or neoplasm\* or tumo?r\*)
- S25. (hiv infection or hiv disease or hiv)
- S26. mental disorders
- S27. ((mental or psychiatric or psychological) (ill\* or disorder or disease or distress or disability))
- S28. ((personality or dysthymic or anxiety or stress or eating or reactive or behavio?r or perception or impulse control or developmental or attention deficit or hyperactivity or conduct or motor skills or movement or tic) disorder)
- S29. (psychosis or schizophrenia or neurosis or depression or bipolar or mania or obsessive or compulsive or panic or phobia or anorexia or bulimia or dissociative or autism or Asperger's or Tourette or affective or borderline or suicide or self injury or self harm or adhd)
- S30. ((substance or drug or alcohol) abuse or addiction) or alcoholism
- S31. self efficacy or self care
- S32. nervous system diseases
- S33. self administration or self assessment or self concept
- S34. patient compliance or patient education or patient participation
- S35. consumer health information or consumer participation
- S36. attitude to health or health behavio?r or health education or health promotion
- S37. disease management or risk reduction behavio?r
- S38. health plan implementation
- S39. self care or self management or self efficacy
- S40. ((patient or consumer or health) (education or participation or behavio?r or compliance or disease management))
- S41. (((behavio?r change) or (problem solving) or (goal setting) or (decision making) or coping or motivation) (patient or consumer))
- S42. (brain (disease or damage or injury))
- S43. MH randomized controlled trials
- S44. MH double-blind studies
- S45. MH single-blind studies

- S46. MH random assignment
- S47. MH pretest-posttest design
- S48. MH cluster sample
- S49. TI (randomised OR randomized)
- S50. AB (random\*)
- S51. TI (trial)
- S52. MH (sample size) AND AB (assigned OR allocated OR control)
- S53. (cerebrovascular or brain ischemia or cerebral infarction or carotid artery disease or stroke or epilepsy or seizure)
- S54. MH (placebos)
- S55. PT (randomized controlled trial)
- S56. AB (CONTROL W5 GROUP)
- S57. MH (CROSSOVER DESIGN) OR MH (COMPARATIVE STUDIES)
- S58. AB (CLUSTER W3 RCT)
- S59. S43 OR S44 OR S45 OR S46 OR S47 OR S48 OR S49 OR S50 OR S51 OR S52 OR S54 OR S55 OR S56 OR S57 OR S58
- S60. MH ANIMALS+
- S61. MH (ANIMAL STUDIES)
- S62. TI (ANIMAL MODEL\*)
- S63. S60 OR S61 OR S62
- S64. (neurodegenerative or Huntingdon's or Parkinson's or amyotrophic lateral sclerosis or multiple sclerosis or motor neuron disease)
- S65. MH (HUMAN)
- S66. S63 NOT S65
- S67. S59 NOT S66
- S68. ((communication or learning or speech or vision or hearing or psychomotor) disorder)
- S69. (deaf or blind)
- S70. S1 OR S2 OR S3 OR S4 OR S5 OR S6 OR S7 OR S8 OR S9 OR S10 OR S11 OR S12 OR S13 OR S14 OR S15 OR S16 OR S17 OR S18 OR S19 OR S20 OR S21 OR S22 OR S23 OR S24 OR S25 OR S26 OR S27 OR S28 OR S29 OR S30 OR S32 OR S42 OR S53 OR S64 OR S68 OR S69
- S71. S31 OR S33 OR S34 OR S35 OR S36 OR S37 OR S38 OR S39 OR S40 OR S41
- S72. S67 AND S70 AND S71
- S73. S67 AND S70 AND S71
