# Supplementary material
Source: HighWire-hosted journal article supplement (https://bmjopen.bmj.com/content/12/8/e056532)
Supplement: inline-supplementary-material-4 [file inline-supplementary-material-4.pdf]

Supplementary Table 2. Full details of all 94 articles included in the systematic review

| First Author | Year | Country   | Intervention                                                                                                                                                 | Disease                      | Delivered by            | Location                        | Maximum dose stated (number of sessions) | Maximum dose stated (length of sessions) | Minimum clinically Effective dose stated | Dose received stated (number of sessions) | Dose stated (length of sessions) | Was dose delivered $\geq$ minimum clinically effective dose | Was fidelity reported and discussed | Was the primary outcome statistically significant |
|--------------|------|-----------|--------------------------------------------------------------------------------------------------------------------------------------------------------------|------------------------------|-------------------------|---------------------------------|------------------------------------------|------------------------------------------|------------------------------------------|-------------------------------------------|----------------------------------|-------------------------------------------------------------|-------------------------------------|---------------------------------------------------|
| Ackerman     | 2012 | Australia | ASMP                                                                                                                                                         | Hip or Knee Osteoarthritis   | HCPs and Lay leaders    | Outpatient clinic and Community | Yes                                      | Yes                                      | Yes                                      | Yes                                       | Yes                              | No                                                          | Yes                                 | No                                                |
| Ambrosino    | 2008 | USA       | Coping skills training - learning to deal better with day-to-day problems that arise                                                                         | Type 1 Diabetes              | HCPs                    | Unclear                         | Yes                                      | Yes                                      | No                                       | Yes                                       | Yes                              | Unclear                                                     | No                                  | No                                                |
| Anvar        | 2018 | Iran      | ASMP                                                                                                                                                         | Rheumatoid Arthritis         | HCPs                    | Outpatient clinic               | Yes                                      | Yes                                      | No                                       | Yes                                       | Yes                              | Unclear                                                     | No                                  | Yes                                               |
| Bantum       | 2014 | USA       | Surviving and Thriving with Cancer website adapted from CDSMP                                                                                                | Cancer survivors             | Lay leaders             | Web-based                       | Yes                                      | No                                       | No                                       | Yes                                       | No                               | Yes                                                         | Yes                                 | Yes                                               |
| Berg         | 2019 | USA       | AWAKE - app based weekly modules with aligned homework, combined with weekly phone calls from a coach to discuss content and homework                        | Cancer survivorship          | Healthcare professional | Web-based and telephone         | Yes                                      | No                                       | Yes                                      | Yes                                       | No                               | Yes                                                         | No                                  | No                                                |
| Berry        | 2015 | USA       | Diabetes group visits - an individualized session to review medications and a medical examination and a group session for diabetes self-management education | Diabetes                     | HCPs                    | Community based                 | Yes                                      | No                                       | No                                       | No                                        | No                               | Unclear                                                     | No                                  | Yes                                               |
| Bersani      | 2017 | Italy     | group psychoeducation focused on healthy lifestyle - including sleep, physical activity, diet, voluptuary habits                                             | Mood and Psychotic disorders | HCPs                    | Outpatient clinic               | Yes                                      | Yes                                      | No                                       | No                                        | Yes                              | Unclear                                                     | No                                  | Yes                                               |

|              |      |                 |                                                                                                                                                                              |                                         |             |                                     |     |     |     |     |     |         |     |     |
|--------------|------|-----------------|------------------------------------------------------------------------------------------------------------------------------------------------------------------------------|-----------------------------------------|-------------|-------------------------------------|-----|-----|-----|-----|-----|---------|-----|-----|
| Bosworth     | 2008 | USA             | Tailored behavioural intervention with 9 educational modules                                                                                                                 | Hypertension                            | HCPs        | Telephone                           | Yes | No  | No  | Yes | Yes | Yes     | Yes | No  |
| Breedland    | 2011 | The Netherlands | FIT program - physical activity combined with an education program                                                                                                           | Rheumatoid Arthritis                    | HCPs        | Outpatient clinic                   | Yes | Yes | No  | No  | No  | Unclear | No  | Yes |
| Brorsson     | 2019 | Sweden          | Guided Self-Determination-Young (GSD-Y) a person-centered communication and reflection education model that can be used in educational program                               | Type 1 Diabetes                         | HCPs        | Outpatient clinic                   | Yes | Yes | No  | Yes | Yes | Yes     | No  | Yes |
| Chamany      | 2015 | USA             | Telephone support through problem solving and goal setting                                                                                                                   | Diabetes                                | HCPs        | Telephone                           | Yes | No  | Yes | Yes | Yes | Yes     | Yes | Yes |
| Chen         | 2018 | China           | Patient-centred self-management empowerment intervention (PCSMEI)                                                                                                            | Stroke                                  | HCPs        | Inpatient, Outpatient and Telephone | Yes | Yes | No  | No  | No  | Unclear | No  | Yes |
| Chew         | 2018 | Malaysia        | Value-based emotion-focused educational programme (VEMOFIT)                                                                                                                  | Type 2 Diabetes                         | HCPs        | Other: Health Clinic                | Yes | Yes | Yes | Yes | Yes | Yes     | No  | No  |
| Christiansen | 2018 | USA             | A behaviour change intervention based on social cognitive and control theories of behavior change targeting physical exercise, walking activity, and disease self-management | Dysvascular Amputation (Unilateral TTA) | HCPs        | Telephone                           | Yes | Yes | No  | Yes | Yes | Yes     | No  | No  |
| Cook         | 2013 | USA             | Wellness Recovery Action Planning including lectures, individual and group exercises, personal sharing and role modeling, and voluntary homework                             | Serious Mental Illness                  | Lay leaders | Community based                     | Yes | Yes | No  | No  | No  | Unclear | No  | Yes |

|                        |      |                 |                                                                                                                                                                                                        |                                     |                         |                                 |     |     |     |     |     |         |     |     |
|------------------------|------|-----------------|--------------------------------------------------------------------------------------------------------------------------------------------------------------------------------------------------------|-------------------------------------|-------------------------|---------------------------------|-----|-----|-----|-----|-----|---------|-----|-----|
| Corado                 | 2018 | USA             | Active, Linkage, Engagement, Retention and Treatment (ALERT) topics included HIV health literacy, Navigating the Health Care System, Disclosure, Adherence, and Self-Efficacy                          | HIV                                 | HCPs                    | Outpatient clinic and Community | Yes | No  | No  | Yes | No  | Unclear | Yes | No  |
| Daryabeygi-Khotbehsara | 2021 | Iran            | Education promoting low-fat food consumption, carb counting and physical activity                                                                                                                      | Type 2 Diabetes                     | Healthcare professional | Community Based                 | Yes | Yes | No  | Yes | No  | Unclear | No  | No  |
| Dash                   | 2015 | India           | Epilepsy health education program designed for those from a low education background.                                                                                                                  | Epilepsy                            | HCPs                    | Outpatient clinic               | Yes | Yes | No  | Yes | Yes | Yes     | No  | Yes |
| Detaille               | 2013 | The Netherlands | CDSMP adapted for workers with chronic disease                                                                                                                                                         | A diagnosed chronic somatic disease | Lay leaders             | Community based                 | Yes | Yes | Yes | No  | No  | Unclear | No  | Yes |
| Dinh                   | 2019 | Vietnam         | Teach-back heart failure self-management intervention individual teach-back before discharge, plus a booklet, a weighing scale, a diary, and a telephone call follow-up at 2 weeks following discharge | Heart failure                       | HCPs                    | Outpatient clinic and Telephone | Yes | Yes | No  | No  | No  | Unclear | No  | Yes |
| Dziedzic               | 2013 | UK              | Looking after your joints programme - Self Management in OA of the Hand (1) joint protection; (2) hand exercises; (3) joint protection and hand exercises combined                                     | Hand Osteoarthritis                 | HCPs                    | Outpatient clinic               | Yes | Yes | Yes | Yes | Yes | Yes     | Yes | Yes |

|                    |      |         |                                                                                                                                                                                                            |                        |             |                           |     |     |     |     |     |         |     |     |
|--------------------|------|---------|------------------------------------------------------------------------------------------------------------------------------------------------------------------------------------------------------------|------------------------|-------------|---------------------------|-----|-----|-----|-----|-----|---------|-----|-----|
| Ehde               | 2015 | USA     | Telephone delivered self-management intervention - cognitive-behavioural and positive psychology strategies for helping participants self-manage pain, depression, and fatigue                             | Multiple Sclerosis     | HCPs        | Telephone                 | Yes | Yes | Yes | Yes | Yes | Yes     | Yes | No  |
| Fernandez Guijarro | 2019 | Spain   | Health-promotion programme covering healthy eating, lifestyle changes, physical activity, hydration, tobacco and alcohol consumption, stress reduction, and sleep quality and nurse led physical activity. | Serious Mental Illness | HCPs        | Community based           | Yes | Yes | No  | Yes | Yes | Unclear | No  | Yes |
| Ferrone            | 2019 | Canada  | Integrated disease management - case management, education, and skills training                                                                                                                            | COPD                   | HCPs        | GP practice and telephone | Yes | No  | No  | Yes | No  | No      | Yes | Yes |
| Forjuoh            | 2014 | USA     | CDSMP and PDA                                                                                                                                                                                              | Type 2 Diabetes        | Lay leaders | Clinic and community      | Yes | Yes | Yes | Yes | Yes | Yes     | No  | No  |
| Fukuoka            | 2019 | Japan   | Disease management program - nurses worked with the subjects and their to achieve individualized clinical target values and goals through education booklets and journal.                                  | Stroke                 | HCPs        | Unclear                   | Yes | No  | No  | No  | No  | Unclear | No  | No  |
| Gallinat           | 2019 | Germany | CBT techniques covering psychoeducation, self-management, supportive monitoring and counselling                                                                                                            | Skin Picking           | HCPs        | Web-based                 | Yes | No  | No  | Yes | No  | No      | No  | Yes |

|                |      |        |                                                                                                                                                                     |                                                                |                         |                                 |     |     |     |     |     |         |     |     |
|----------------|------|--------|---------------------------------------------------------------------------------------------------------------------------------------------------------------------|----------------------------------------------------------------|-------------------------|---------------------------------|-----|-----|-----|-----|-----|---------|-----|-----|
| Geremia        | 2019 | Brazil | Compact, cost-effective, education program (CEPT1)                                                                                                                  | Type 1 Diabetes                                                | HCPs                    | Community based                 | Yes | Yes | No  | Yes | Yes | Yes     | No  | Yes |
| Goldberg       | 2013 | USA    | CDSMP adapted for psychiatric settings 'Living Well'                                                                                                                | Serious Mental Illness with comorbid chronic medical condition | HCPs and Lay leaders    | Outpatient clinic and Community | Yes | Yes | No  | Yes | Yes | No      | No  | Yes |
| Golshahi       | 2015 | Iran   | Hypertension self-management - Group A educated about self-care behaviors through eight sessions, group B and group C educated through four pamphlets or eight SMS. | Hypertension                                                   | HCPs                    | Outpatient clinic and Telephone | Yes | Yes | Yes | No  | No  | Unclear | No  | Yes |
| Grammatopoulou | 2016 | Greece | Holistic Intervention - recognise facilitators and barriers faced to develop the necessary behaviors and skills to control their disease                            | Asthma                                                         | HCPs                    | Outpatient clinic and home      | Yes | Yes | No  | Yes | Yes | Yes     | Yes | Yes |
| Groessl        | 2010 | USA    | CDSMP adapted for veterans                                                                                                                                          | Chronic Hepatitis C                                            | HCPs and Lay leaders    | Outpatient clinic               | Yes | Yes | No  | Yes | Yes | Yes     | No  | Yes |
| Grønning       | 2012 | Norway | Arthritis outpatient Educational Program                                                                                                                            | Polyarthritis                                                  | HCPs                    | Outpatient clinic               | Yes | Yes | No  | No  | No  | Unclear | No  | Yes |
| Harel-Katz     | 2020 | Israel | Improving participation after stroke self-management developed from CDSMP focused on managing home, community, work and social                                      | Stroke                                                         | Healthcare professional | Community Based                 | Yes | Yes | Yes | Yes | Yes | Yes     | No  | No  |
| Harrington     | 2010 | UK     | Exercise and education scheme through exercise, guest speakers, goal-setting and social session                                                                     | Stroke                                                         | HCPs                    | Community based                 | Yes | Yes | Yes | Yes | Yes | No      | Yes | Yes |

|          |      |                 |                                                                                                                                                                                     |                                                                                                                                                           |                         |                               |     |     |     |     |     |         |     |     |
|----------|------|-----------------|-------------------------------------------------------------------------------------------------------------------------------------------------------------------------------------|-----------------------------------------------------------------------------------------------------------------------------------------------------------|-------------------------|-------------------------------|-----|-----|-----|-----|-----|---------|-----|-----|
| Härter   | 2016 | Germany         | Telephone based health coaching intervention, to enhance health behaviour change through MI, goal setting, shared decision making                                                   | diabetes type 2, coronary artery disease, hypertension, heart failure, asthma, chronic obstructive pulmonary disease, chronic depression or schizophrenia | Healthcare professional | Telephone                     | Yes | No  | Yes | Yes | Yes | Yes     | Yes | No  |
| Heutink  | 2011 | The Netherlands | CONECSI (COping with NEuropathic Spinal cord Injury pain) comprises educational, cognitive, and behavioural elements targeted at coping with CNSCIP                                 | Spinal cord injury                                                                                                                                        | HCPs                    | Rehabilitation Centre         | Yes | Yes | No  | Yes | Yes | Yes     | No  | No  |
| Hewlett  | 2011 | UK              | CBT, problem solving and goal setting for fatigue and well-being self-management                                                                                                    | Rheumatoid Arthritis                                                                                                                                      | HCPs                    | Unclear (Face-to-face)        | Yes | Yes | No  | Yes | Yes | Yes     | No  | Yes |
| Holm     | 2020 | Denmark         | GLA:D exercise and education program                                                                                                                                                | Knee Osteoarthritis                                                                                                                                       | Healthcare professional | Community Based               | Yes | Yes | Yes | Yes | Yes | No      | Yes | No  |
| Holt     | 2019 | UK              | STEPWISE - Each session covered lifestyle changes to help the participants take control of their weight through problem solving                                                     | schizophrenia, schizoaffective disorder or first-episode psychosis                                                                                        | HCPs                    | Community based and telephone | Yes | Yes | Yes | Yes | Yes | No      | Yes | No  |
| Houlihan | 2017 | USA             | My Care My Call - promote skill development and facilitate motivation using consumer-centered goal-setting and coaching, education, resource referral, and support-network building | Spinal cord injury                                                                                                                                        | Lay leaders             | Telephone                     | Yes | No  | No  | Yes | Yes | Unclear | No  | Yes |

|           |      |                 |                                                                                                                                                                                       |                                                |             |                   |     |     |     |     |     |         |     |     |
|-----------|------|-----------------|---------------------------------------------------------------------------------------------------------------------------------------------------------------------------------------|------------------------------------------------|-------------|-------------------|-----|-----|-----|-----|-----|---------|-----|-----|
| House     | 2018 | UK              | Standardized supported self-management - goal setting, resources and barriers influencing success in reaching goals, and self-monitoring of goal attainment                           | Type 2 Diabetes with intellectual disability   | HCPs        | Home              | Yes | Yes | Yes | Yes | Yes | Yes     | Yes | Yes |
| Jaipakdee | 2015 | Thailand        | Diabetes self-management support (DSMS) with a computer-assisted instruction                                                                                                          | Diabetes                                       | HCPs        | Community based   | No  | Yes | No  | No  | No  | Yes     | No  | Yes |
| James     | 2015 | Australia       | ENRICH: Exercise and Nutrition Routine Improving Cancer Health                                                                                                                        | Cancer survivors                               | HCPs        | Community based   | Yes | Yes | No  | Yes | Yes | Yes     | No  | Yes |
| Jiang     | 2019 | China           | Self-efficacy-focused structured education programme provided diabetes-related knowledge and DSM skills based on self-efficacy theory                                                 | Type 2 Diabetes                                | HCPs        | Outpatient clinic | Yes | Yes | No  | No  | No  | Unclear | No  | Yes |
| John      | 2013 | UK              | Cognitive Behavioural Education Programme - challenge their way of thinking, changing maladaptive coping skills, cognitions or emotions to lead to more adaptive changes in behaviour | Rheumatoid Arthritis                           | HCPs        | Outpatient clinic | Yes | Yes | No  | No  | No  | Unclear | No  | Yes |
| Ju        | 2018 | China           | Peer support provided with usual education                                                                                                                                            | Diabetes                                       | Lay leaders | Community based   | No  | No  | No  | No  | No  | Unclear | No  | Yes |
| Kasteleyn | 2015 | The Netherlands | Three home visits by a diabetes nurse to increase self-efficacy and illness perceptions                                                                                               | Type 2 Diabetes and first acute coronary event | HCPs        | Home              | Yes | Yes | Yes | Yes | Yes | Yes     | No  | No  |

|             |      |                               |                                                                                                                                                                                                                                                        |                    |                         |                                           |     |     |     |     |     |         |     |     |
|-------------|------|-------------------------------|--------------------------------------------------------------------------------------------------------------------------------------------------------------------------------------------------------------------------------------------------------|--------------------|-------------------------|-------------------------------------------|-----|-----|-----|-----|-----|---------|-----|-----|
| Kessler     | 2018 | France, Germany, Italy, Spain | Adapted Living well with COPD Programme - home monitoring and e-health through telephone/web platform                                                                                                                                                  | COPD               | HCPs                    | Home and Telephone and web-based platform | Yes | No  | Yes | Yes | No  | Yes     | Yes | No  |
| Kooijmans   | 2017 | The Netherlands               | HABITS intervention - optimizing intentions toward a healthier lifestyle and improving perceived behavioural control                                                                                                                                   | Spinal cord injury | HCPs                    | Community based and home                  | Yes | No  | No  | Yes | No  | Yes     | Yes | No  |
| Laakkonen   | 2016 | Finland                       | Self-management group rehabilitation to enhance participants' mastery, self-efficacy, and problem-solving skills and to empower them                                                                                                                   | Dementia           | HCPs                    | Community based                           | Yes | Yes | No  | No  | No  | Unclear | No  | Yes |
| Lopez-Lopez | 2020 | Spain                         | Physical therapy exercise plus self-management program with education and a problem-based session                                                                                                                                                      | COPD               | Healthcare professional | Inpatient                                 | Yes | No  | No  | No  | No  | Unclear | No  | Yes |
| Luciano     | 2011 | Spain                         | Psychoeducation Program included information about symptoms, comorbid conditions, potential causes, psychosocial factors, current treatments, exercise, and barriers to behavior change and training for relaxation, pain relief, and stress reduction | Fibromyalgia       | HCPs                    | GP practice                               | Yes | Yes | No  | Yes | Yes | No      | No  | Yes |
| Ludman      | 2016 | USA                           | self-management support service – depression self-management training, recovery coaching, and care coordination                                                                                                                                        | Depression         | HCPs and Lay leaders    | Community based and telephone             | Yes | No  | Yes | Yes | No  | No      | Yes | Yes |



|             |      |           |                                                                                                                                                                                                                         |                                       |                         |                                 |     |     |     |     |     |         |     |     |
|-------------|------|-----------|-------------------------------------------------------------------------------------------------------------------------------------------------------------------------------------------------------------------------|---------------------------------------|-------------------------|---------------------------------|-----|-----|-----|-----|-----|---------|-----|-----|
| Manning     | 2014 | UK        | Education, Self-Management, and Upper Extremity Exercise Training in People with Rheumatoid Arthritis [EXTRA] program                                                                                                   | Rheumatoid Arthritis                  | HCPs                    | Outpatient clinic               | Yes | Yes | No  | Yes | No  | Yes     | No  | Yes |
| Mansouri    | 2019 | Iran      | Oral and Written Education Program                                                                                                                                                                                      | Heart failure                         | HCPs                    | Outpatient clinic               | Yes | Yes | No  | No  | No  | Unclear | No  | Yes |
| Markle-Reid | 2018 | Canada    | The program offered up to 3 in-home visits; monthly group wellness sessions; monthly case conferences; and ongoing nurse-led care coordination.                                                                         | Type 2 Diabetes with 3+ comorbidities | HCPs and Lay leaders    | Community based and home        | Yes | No  | No  | Yes | No  | Unclear | Yes | No  |
| Marsden     | 2009 | Australia | Community Living After Stroke for Survivors and Carers' (CLASSIC) - each session included a 1-hour physical activity followed by a 1-hour education delivered via presentations, group discussions and group activities | Stroke                                | HCPs                    | Outpatient clinic               | Yes | Yes | No  | Yes | Yes | Yes     | No  | No  |
| Miller      | 2020 | Canada    | COMMENCE - chronic pain self-management support with pain science education and exercise                                                                                                                                | Chronic pain                          | Healthcare professional | Community Based                 | Yes | Yes | Yes | Yes | No  | No      | No  | Yes |
| Minshall    | 2020 | Australia | Stroke Care Optimal Health Program (SCOHOP) Workbook based psychosocial intervention with education, self-management and reflective exercises                                                                           | Stroke                                | Healthcare professional | Outpatient or Home or Telephone | Yes | Yes | No  | Yes | Yes | Unclear | No  | No  |

|                 |      |              |                                                                                                                                                                                                                                         |                        |                         |                                 |     |     |     |     |     |         |     |     |
|-----------------|------|--------------|-----------------------------------------------------------------------------------------------------------------------------------------------------------------------------------------------------------------------------------------|------------------------|-------------------------|---------------------------------|-----|-----|-----|-----|-----|---------|-----|-----|
| Mohammadpour    | 2015 | Iran         | A supportive educational intervention plus follow up telephone calls with information on functions of cardiovascular system, aetiology, management of MI risk factors, adherence to treatment and dietary regimens                      | Myocardial Infarction  | HCPs                    | Outpatient clinic and Telephone | Yes | Yes | No  | No  | No  | Unclear | No  | Yes |
| Muchiri         | 2016 | South Africa | Nutrition Education Programme                                                                                                                                                                                                           | Diabetes               | HCPs                    | Community based                 | Yes | Yes | No  | Yes | Yes | Yes     | No  | No  |
| Nguyen          | 2018 | Vietnam      | CKD booklet and a handout, one face-to-face session and two brief follow-up sessions.                                                                                                                                                   | Chronic Kidney Disease | HCPs                    | Outpatient clinic and Telephone | Yes | Yes | No  | No  | No  | Unclear | No  | Yes |
| O'Toole         | 2021 | Ireland      | OPTIMAL intervention promoting accomplishments, vicarious learning, persuasion, interpretation of emotional states                                                                                                                      | Multimorbidity         | Healthcare professional | Community Based                 | Yes | Yes | Yes | Yes | Yes | Yes     | No  | No  |
| Pérez-Escamilla | 2015 | USA          | Culturally tailored diabetes education and counselling treatment group including education, skills, and support in the areas of nutrition, physical activity, blood glucose monitoring, medication adherence, and medical appointments. | Type 2 Diabetes        | HCPs                    | Home                            | Yes | No  | No  | No  | No  | Unclear | Yes | Yes |

|              |      |                 |                                                                                                                                                                                                                                                                               |                                           |                      |                                 |     |     |     |     |     |         |     |     |
|--------------|------|-----------------|-------------------------------------------------------------------------------------------------------------------------------------------------------------------------------------------------------------------------------------------------------------------------------|-------------------------------------------|----------------------|---------------------------------|-----|-----|-----|-----|-----|---------|-----|-----|
| Pinxsterhuis | 2017 | Norway          | self-management program for coping with their illness and dealing with healthcare professionals and family, developed through educational presentations, the exchange of experiences, modelling of self-management skills, guided mastery practice, and informative feedback. | Chronic fatigue syndrome                  | HCPs and Lay leaders | Outpatient clinic               | Yes | Yes | No  | Yes | Yes | Yes     | No  | No  |
| Ridsdale     | 2018 | UK              | Self-management education for people with poorly controlled epilepsy (SMILE [UK]), based on MOSES                                                                                                                                                                             | Epilepsy                                  | HCPs                 | Community based                 | Yes | Yes | Yes | Yes | Yes | Yes     | Yes | No  |
| Rothschild   | 2014 | USA             | Mexican American Trial of Community Health Worker (MATCH) knowledge and skills in diabetes self-management, with opportunities to practice goal setting and self-management.                                                                                                  | Type 2 Diabetes                           | HCPs                 | Home                            | Yes | Yes | No  | Yes | No  | No      | Yes | Yes |
| Sajatovic    | 2018 | USA             | TargetEd MAnageMent Intervention [TEAM]                                                                                                                                                                                                                                       | Stroke and TIA                            | HCPs and Lay leaders | Outpatient clinic and Telephone | Yes | Yes | No  | Yes | No  | Unclear | No  | Yes |
| Salyers      | 2014 | USA             | Illness management and recovery - Incorporating psychoeducation, cognitive-behavioral approaches, relapse prevention, social skills training, and coping skills training.                                                                                                     | Schizophrenia or schizoaffective disorder | HCPs                 | Community based                 | Yes | No  | No  | Yes | No  | No      | Yes | No  |
| Smeulders    | 2010 | The Netherlands | CDSMP                                                                                                                                                                                                                                                                         | Congestive Heart Failure                  | HCPs and Lay leaders | Outpatient clinic               | Yes | Yes | No  | Yes | No  | Unclear | No  | No  |

|              |      |                 |                                                                                                                                                                                   |                                              |                         |                                          |     |     |     |     |     |         |     |     |
|--------------|------|-----------------|-----------------------------------------------------------------------------------------------------------------------------------------------------------------------------------|----------------------------------------------|-------------------------|------------------------------------------|-----|-----|-----|-----|-----|---------|-----|-----|
| Spencer      | 2011 | USA             | Racial and Ethnic Approaches to Community Health (REACH) Initiative - setting patient specific goals and supporting their progress                                                | Diabetes                                     | HCPs                    | Outpatient clinic and Home and Telephone | Yes | Yes | No  | Yes | Yes | No      | No  | Yes |
| Still        | 2021 | USA             | TechSupport, integrating technology based components and emotional/empathic components known as positive psychological training                                                   | Hypertension                                 | Healthcare professional | Web-based                                | Yes | Yes | Yes | Yes | Yes | Yes     | No  | No  |
| Stuifbergen  | 2010 | USA             | The Lifestyle Counts intervention developed from the Wellness for Women with MS curriculum                                                                                        | Fibromyalgia                                 | HCPs                    | Outpatient clinic and Telephone          | Yes | Yes | No  | Yes | No  | Yes     | No  | No  |
| Swoboda      | 2016 | USA             | Multiple-Goal Intervention - combination of goal setting and decision support coaching                                                                                            | Diabetes                                     | HCPs                    | Outpatient clinic and Telephone          | Yes | No  | Yes | Yes | No  | No      | No  | Yes |
| Taggart      | 2017 | UK              | DESMOND-ID (Diabetes and Self-Management for Ongoing and Newly Diagnosed for patients with Type 2 diabetes)                                                                       | Type 2 Diabetes with intellectual disability | HCPs                    | Community based                          | Yes | Yes | No  | Yes | No  | Yes     | Yes | Yes |
| Thoolen      | 2009 | The Netherlands | Beyond Good Intentions – a 12-week self-management course                                                                                                                         | Type 2 Diabetes                              | HCPs                    | Community based                          | Yes | Yes | No  | No  | No  | Unclear | No  | Yes |
| Van der Meer | 2009 | The Netherlands | Internet based self-management program asthma control monitoring and treatment advice, online and group education, and remote Web communications with a specialized asthma nurse. | Asthma                                       | HCPs                    | Web-based and Unclear                    | Yes | Yes | No  | Yes | No  | Unclear | No  | Yes |

|             |      |                 |                                                                                                                                        |                                                       |                         |                                 |     |     |     |     |     |         |     |     |
|-------------|------|-----------------|----------------------------------------------------------------------------------------------------------------------------------------|-------------------------------------------------------|-------------------------|---------------------------------|-----|-----|-----|-----|-----|---------|-----|-----|
| van Erp     | 2019 | Netherlands     | Back on Track education, self-management and goal setting intervention, including cognitive behavioural approaches                     | Chronic lower back pain                               | Healthcare professional | Community Based                 | Yes | Yes | Yes | Yes | Yes | Yes     | Yes | No  |
| Van Rooijen | 2010 | South Africa    | Dietary and physical activity education for ongoing nutrition self-management and physical activity                                    | Type 2 Diabetes                                       | HCPs                    | Outpatient clinic               | Yes | No  | No  | No  | No  | Unclear | No  | Yes |
| Vos         | 2019 | The Netherlands | Beyond Good Intentions                                                                                                                 | Type 2 Diabetes                                       | HCPs                    | Community based                 | Yes | Yes | No  | No  | No  | Unclear | No  | No  |
| Walker      | 2011 | USA             | Telephonic behavioural intervention focused on medication adherence and lifestyle changes through healthy eating and physical activity | Diabetes                                              | HCPs                    | Telephone                       | Yes | No  | No  | Yes | Yes | Unclear | No  | Yes |
| Walsh       | 2020 | UK              | FASA facilitating activity and self-management through problem solving and exercise derived from ESCAPE intervention                   | Lower limb osteoarthritis and chronic lower back pain | Healthcare professional | Community Based                 | Yes | Yes | Yes | Yes | Yes | Yes     | No  | Yes |
| Wang        | 2016 | Singapore       | The Myocardial Infarction Home-based Self-management Programme (MIHSMP) with Heart Recovery Education Booklet (HREB)                   | Myocardial Infarction                                 | HCPs                    | Outpatient clinic and Telephone | Yes | Yes | No  | No  | No  | Unclear | No  | No  |
| Wang        | 2018 | Singapore       | Coronary Heart Disease Self-management Programme (CHDSMP)                                                                              | Coronary Heart Disease                                | HCPs                    | Home and Telephone              | Yes | Yes | No  | No  | No  | Unclear | No  | No  |
| Webel       | 2010 | USA             | Positive Self-Management Program (PSMP)                                                                                                | HIV                                                   | Lay leaders             | Community based                 | Yes | Yes | No  | No  | No  | Unclear | No  | No  |

|           |      |                      |                                                                                                                                                                                    |                                           |                      |                                 |     |     |     |     |     |         |     |     |
|-----------|------|----------------------|------------------------------------------------------------------------------------------------------------------------------------------------------------------------------------|-------------------------------------------|----------------------|---------------------------------|-----|-----|-----|-----|-----|---------|-----|-----|
| Wegener   | 2009 | USA                  | Promoting Amputee Life Skills Self-management program                                                                                                                              | Limb loss                                 | HCPs and Lay leaders | Community based                 | Yes | Yes | Yes | Yes | Yes | Yes     | No  | Yes |
| Wolf      | 2017 | USA                  | CDSMP                                                                                                                                                                              | Stroke                                    | HCPs                 | Outpatient clinic               | Yes | Yes | Yes | No  | No  | Unclear | No  | No  |
| Wu        | 2017 | Australia and Taiwan | T-CDSMP adapted for Taiwanese speaking                                                                                                                                             | Cardiovascular disease and Diabetes       | HCPs                 | Outpatient clinic and Telephone | Yes | Yes | No  | No  | No  | Unclear | No  | No  |
| Wu        | 2018 | Taiwan               | Innovative self-management intervention a video, trainee manual, participation in the self-efficacy-enhancing program, and telephone interviews                                    | End Stage Renal Disease                   | HCPs                 | Outpatient clinic and Telephone | Yes | Yes | Yes | No  | No  | Unclear | No  | Yes |
| Yip       | 2008 | Hong Kong            | ASMP with added goal-directed exercise component                                                                                                                                   | Osteoarthritis                            | HCPs                 | Outpatient clinic               | Yes | Yes | No  | No  | No  | Unclear | No  | Yes |
| Young     | 2016 | China                | Psycho-education group understanding dementia, coping skills, exercise, diet, mood, own strengths, accepting change, communication, relationships, the future                      | Major neurocognitive disorder             | HCPs                 | Community based                 | Yes | Yes | No  | No  | No  | Unclear | No  | No  |
| Zakrisson | 2018 | Sweden               | Self-management intervention based on Bandura's theory of self-efficacy using techniques such as performance mastery, modelling, interpretation of symptoms, and social persuasion | COPD and Coronary Heart Failure           | HCPs                 | Community based                 | Yes | Yes | No  | Yes | Yes | Unclear | Yes | No  |
| Zhang     | 2015 | USA                  | Stay Dry program biofeedback pelvic floor muscle exercise plus a support group or telephone contact                                                                                | Prostate cancer with urinary incontinence | HCPs                 | Telephone and unclear           | Yes | Yes | No  | No  | No  | Unclear | No  | Yes |
